# Supplementary material for: Defective RAB31-mediated megakaryocytic early endosomal trafficking of VWF, EGFR, and M6PR in RUNX1 deficiency
Source: PubMed Central journal article supplement — Blood Adv. 2022 Sep 1;6(17):5100–12. doi: 10.1182/bloodadvances.2021006945 (PMC9631641; doi:10.1182/bloodadvances.2021006945), 2022-09-01
Supplement: advancesADV2021006945-suppl1.pdf [file advancesADV2021006945-suppl1.pdf]

**Supplemental Table 1:** *RAB31* Oligonucleotide primer sequences used for PCR in ChIP analysis.

| <b>Primers</b> | <b>Position</b> | <b>Strand</b> | <b>Nucleotide sequence</b>              |
|----------------|-----------------|---------------|-----------------------------------------|
| Site I         | -858/-800       | Forward       | -858/-839 5'- GGGATCTCCACGTTTCTACCT-3'  |
|                |                 | Reverse       | -779/-800 5'- TTTCTCAGTAGAGCAAATCCTG-3' |
| Site II        | -978/-867       | Forward       | -979/-960 5'- GAGTGGATGAGGTGCTCTAG-3'   |
|                |                 | Reverse       | -867/-886 5'-CCTGCATCGTTCCTAACTGG-3'    |
| Site III       | -1502/-1337     | Forward       | -1502/-1483 5'-TGCCACATAGAAGACTCTG-3'   |
|                |                 | Reverse       | -1337/-1356 5'-ATTAAATCCCCAGAAGAGC-3'   |
| Site IV        | -2019/-1874     | Forward       | -2019/-2001 5'-ATGAGACACAAATGAGGTC-3'   |
|                |                 | Reverse       | -1855/-1874 5'-CTGCTCTCTTCTCCACTAGA-3'  |

**Supplemental Table 2.** Infra-red (IR) labeled *RAB31* nucleotide probes for EMSA analysis.

| <b>Primers</b> | <b>Position</b> | <b>Nucleotide sequence</b>         | <b>Strand</b> |
|----------------|-----------------|------------------------------------|---------------|
| Site I         | -816/-797       | 5'/5IRD700/CTGCCACACGAGTTGCAGG-3'  | Forward       |
|                |                 | 5'/5IRD700/GACGGGTGTGCTCAACGTCC-3' | Reverse       |
| Site II        | -976/-957       | 5'/5IRD700/TGGATGAGGTGCTCTAGGCC-3' | Forward       |
|                |                 | 5'/5IRD700/ACCTACTCCACGAGATCCGG-3' | Reverse       |
| Site III       | -1506/<br>-1487 | 5'/5IRD700/ACCTCGTCCACGAGATCCGG-3' | Forward       |
|                |                 | 5'/5IRD700/TGGAGCAGGTGCTCTAGGCC-3' | Forward       |
| Site IV        | -2016/<br>-1997 | 5'/5IRD700/AGACACAAATGAGGTCATTT-3' | Forward       |
|                |                 | 5'/5IRD700/TCTGTGTTTACTCCAGTAAA-3' | Reverse       |

**Supplemental Table 3.** Primers used to generate various *RAB31* promoter elements.

| Constructs (-2023/+41 bp) | No. | Primers with restriction sites (5'-3')                                                                                                          | Position        | Strand  |
|---------------------------|-----|-------------------------------------------------------------------------------------------------------------------------------------------------|-----------------|---------|
| Wild type*                | 1   | aat <i>acgctg</i> CAGAATGAGACACAAATGAGGTC                                                                                                       | -2023/<br>-2001 | Forward |
|                           | 2   | aat <i>gctagc</i> CAGTCCTCAGAGGTACAGGTAGA<br>AACGTGGAGATCCC                                                                                     | -858/<br>-822   | Reverse |
|                           | 3   | ggg <i>gctagc</i> GGTTTCTGCCCACACGAGTTGCAG<br>GATTTGCTCTACTG                                                                                    | -821/<br>-784   | Forward |
|                           | 4   | ggg <i>aagctt</i> ACCCCGAGAAGGCACACTTTGAGC<br>TCCCGTATCG                                                                                        | +41/-9          | Reverse |
| Site I mutant             | 1   | Same as above in wild type construct                                                                                                            |                 |         |
|                           | 2   | Same as above in wild type construct                                                                                                            |                 |         |
|                           | 3   | aat <i>gctagc</i> GGTTTCTG <b>CAAGT</b> ACGAGTTGCAG<br>GATTTGCTCTACTG<br>Substitutions underlined in <i>RUNX1</i> site I (bold)                 | -821/<br>-784   | Forward |
|                           | 4   | Same as above in wild type construct                                                                                                            |                 |         |
| Site II mutant            | 1   | Same as above in wild type construct                                                                                                            |                 |         |
|                           | 2   | aat <i>gctagc</i> CGTGTGGGCAGAAACCCAGTCCTC<br>AGAGGTACA ..... GAGC <b>ATAGA</b> ATCC<br>Substitutions underlined in <i>RUNX1</i> site II (bold) | -975/<br>-806   | Reverse |
|                           | 3   | ggg <i>gctagc</i> AGTTGCAGGATTTGCTCTACTGAG<br>AAAAGAC                                                                                           | -805/<br>-765   | Forward |
|                           | 4   | Same as above in wild type construct                                                                                                            |                 |         |
| Site III mutant           | 1   | Same as above in wild type construct                                                                                                            |                 |         |
|                           | 2   | aat <i>gctagc</i> CAGAGTCTTCTAT <b>ACAT</b> GCGAG<br>Substitutions underlined in <i>RUNX1</i> site III (bold)                                   | -1503/<br>-1483 | Reverse |
|                           | 3   | aat <i>gctagc</i> CTTTGGATACAGAGTCAAGGAC                                                                                                        | -1482/<br>-1461 | Forward |
|                           | 4   | Same as above in wild type construct                                                                                                            |                 |         |
| Site IV mutant            | 1   | aat <i>acgctg</i> CAGAATGAGACACAA <b>CACTT</b> G<br>Substitutions underlined in <i>RUNX1</i> site IV (bold)                                     | -2023/<br>-2001 | Forward |
|                           | 2   | Same as above in wild type construct                                                                                                            |                 |         |
|                           | 3   | Same as above in wild type construct                                                                                                            |                 |         |
|                           | 4   | Same as above in wild type construct                                                                                                            |                 |         |

The position numbering shown is from the ATG site. Appropriate restriction sites introduced at the 5' end of the primers indicated in italics. *acgctg*= Mlu I site; *gctagc*=Nhe I site and *gctagc*=Hind III site.

\* Wild type promoter regions were generated by PCR using the primer set 1 and 2 or 3 and 4 separately with the restriction site (s) incorporated and cloned into TOPO TA vectors. The recombinants were digested with same restriction enzymes and the genomic inserts were ligated and subcloned into pGL3 basic with appropriate sites.

Mutant promoter regions were also generated using primers as indicated above.

**Supplemental Table 4.** Antibodies used in this manuscript.

WB: western blot; IF: immunofluorescence

| <b>Antigen</b>   | <b>Catalogue</b> | <b>Vendor</b>                | <b>Application</b> |
|------------------|------------------|------------------------------|--------------------|
| RUNX1(N-20)      | sc-8563          | Santa Cruz Biotechnology     | WB/IF              |
| RUNX1            | sc-365644        | Santa Cruz Biotechnology     | WB                 |
| IgG              | sc-2028          | Santa Cruz Biotechnology     | WB/IF              |
| RAB31            | ARP61983-P050    | Aviva System Technology      | WB/IF              |
| CD-MPR (H-7)     | sc-365196        | Santa Cruz Biotechnology     | WB/IF              |
| $\beta$ -actin   | sc-1616          | Santa Cruz Biotechnology     | WB                 |
| VWF              | ab6994           | Abcam                        | WB/IF              |
| mPR alpha        | PA5-61376        | Invitrogen/Thermo Scientific | WB/IF              |
| CD63(Mx49.129.5) | sc-5275          | Santa Cruz Biotechnology     | WB/IF              |
| EGFR             | 4267             | Cell Signaling Technology    | IF                 |
| EEA1             | 2411             | Cell Signaling Technology    | IF                 |
| CD-M6PR          | ab134153         | Abcam                        | WB/IF              |
